# Supplementary material
Source: MDPI journal article supplement (https://www.mdpi.com/2073-4344/14/2/130)
Supplement: s1 [file s1]

## Supplementary Materials

# Regulating Lattice Oxygen on the Surfaces of Porous Single-Crystalline NiO for Stabilized and Enhanced CO Oxidation

Xin Wen <sup>1,2</sup> and Kui Xie <sup>2,3,\*</sup>

<sup>1</sup> College of Chemistry, Fuzhou University, Fuzhou 350108, China; wenxin@fjirsm.ac.cn

<sup>2</sup> Key Laboratory of Design and Assembly of Functional Nanostructures, Fujian Institute of Research on the Structure of Matter, Chinese Academy of Sciences, Fuzhou 350002, China

<sup>3</sup> Advanced Energy Science and Technology Guangdong Laboratory, Huizhou 116023, China

\* Correspondence: kxie@fjirsm.ac.cn

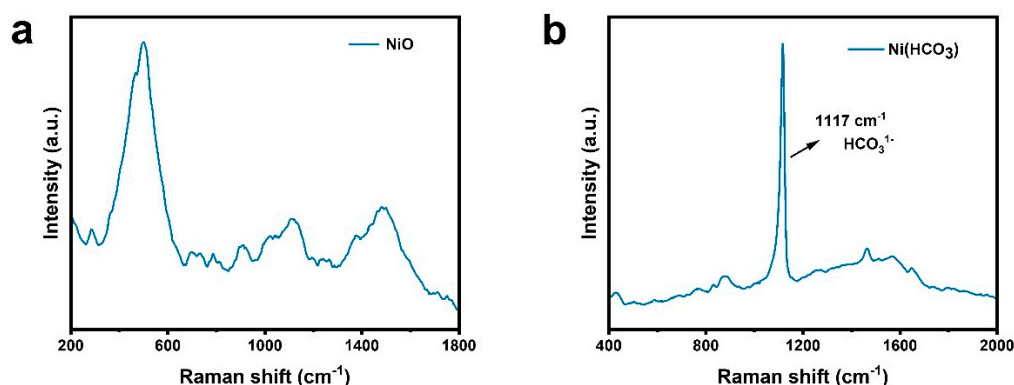

Figure S1. (a) Raman spectra of PSCs NiO. (b) Raman spectra of Ni (HCO<sub>3</sub>)<sub>2</sub> precursor.

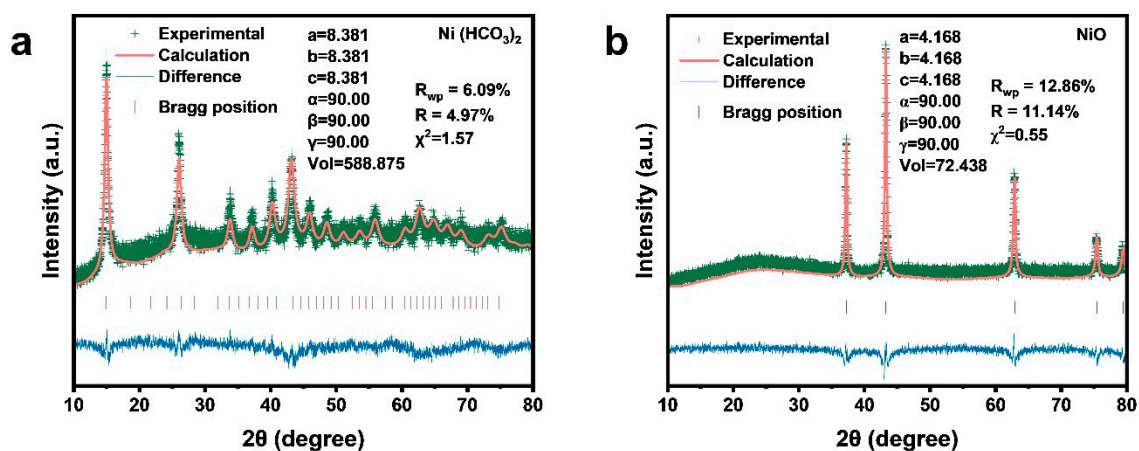

Figure S2. XRD rietveld refinement patterns of (a) Ni (HCO<sub>3</sub>)<sub>2</sub>. (b) NiO.

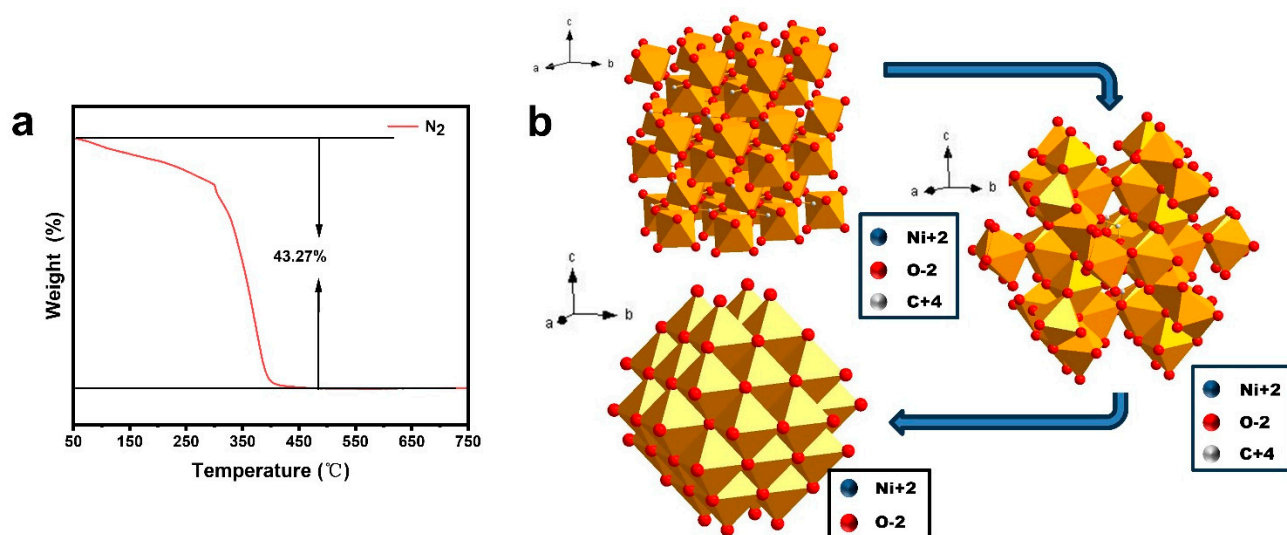

**Figure S3.** (a) Thermogravimetric curves of the transformation of Ni (HCO<sub>3</sub>)<sub>2</sub> precursor to NiO. (b) Schematic of the crystal structure model for the transformation of Ni (HCO<sub>3</sub>)<sub>2</sub> to NiO.

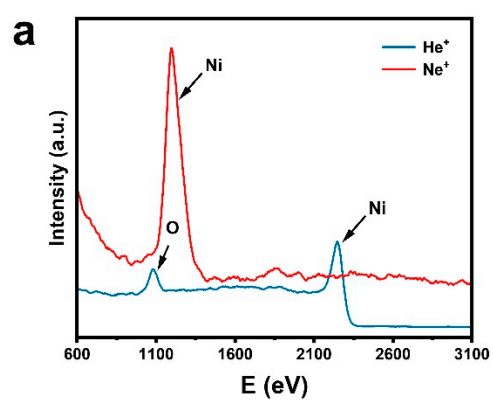

**Figure S4.** (a) HS-LEIS spectra of PSCs NiO.

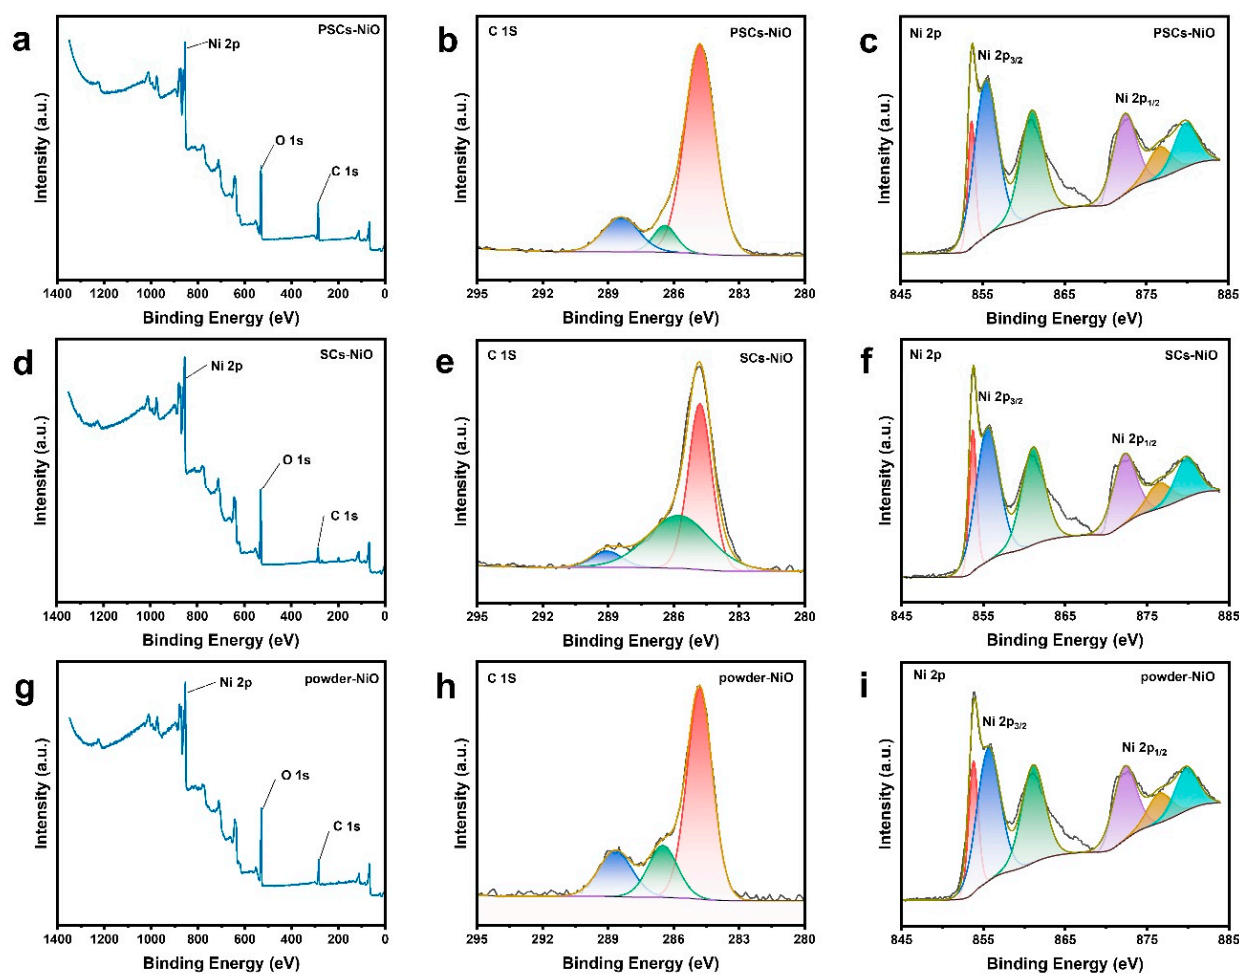

**Figure S5.** The integral XPS spectrum (a, d, g); XPS spectra of the C 1s (b, e, h); XPS spectra of the Ni 2p peaks of PSCs NiO, SCs NiO and powder NiO (c, f, i). (a–c) PSCs NiO. (d–f) SCs NiO. (g–i) powder NiO.

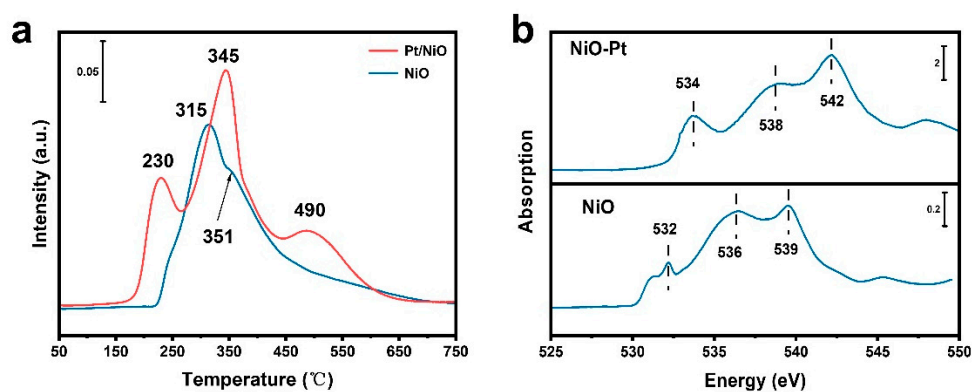

**Figure S6.** (a) H<sub>2</sub>-TPR profiles of NiO and Pt/NiO. (b) EXAFS of NiO and Pt/NiO oxygen atoms in the lattice.

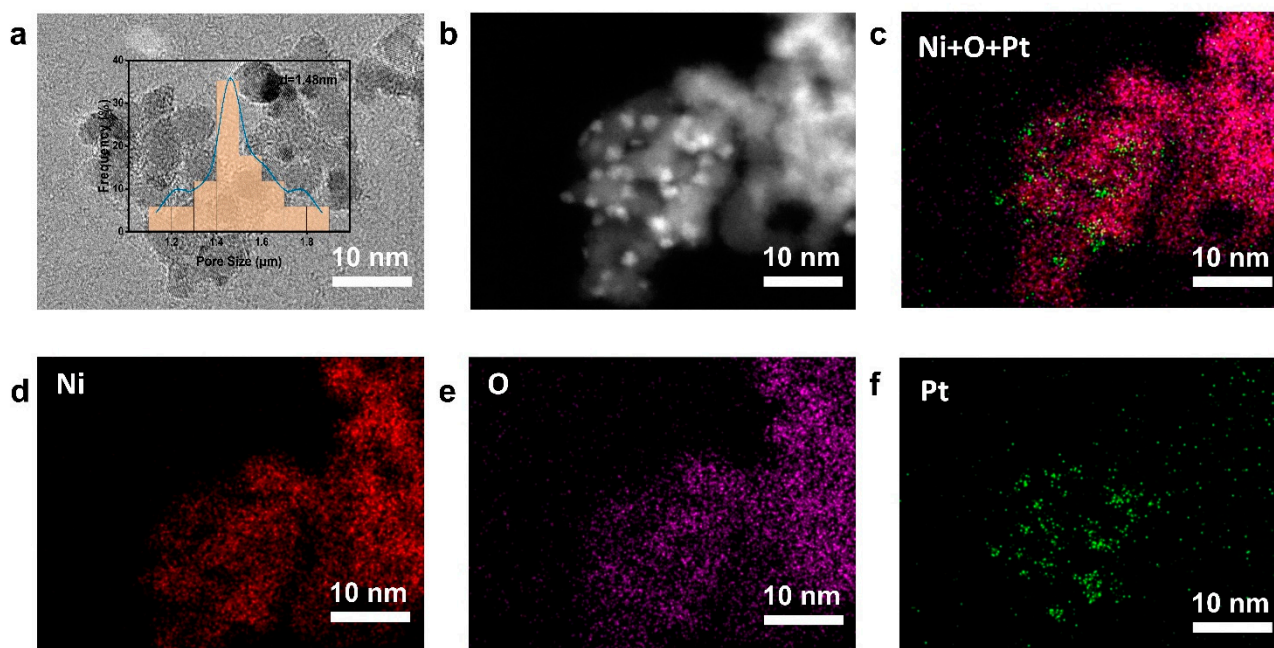

**Figure S7.** (a) Cs-HAADF-STEM images of PSCs NiO with 2.07 wt% Pt, and (b–f) the mapping of PSCs NiO with 2.07 wt% Pt.

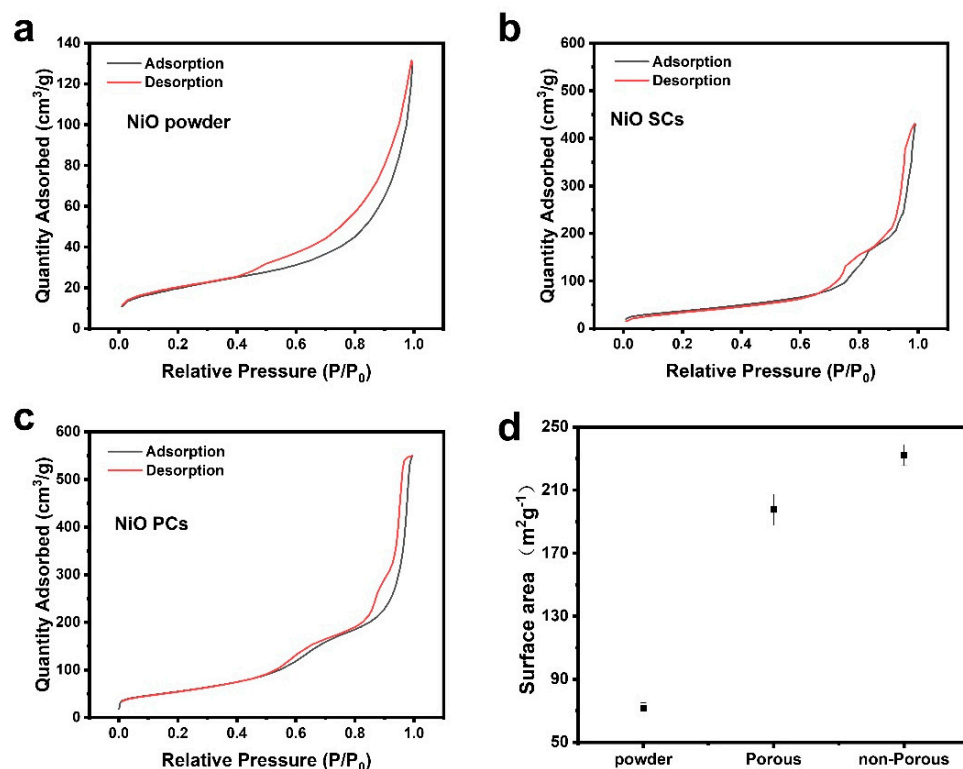

**Figure S8.** (a–c)  $\text{N}_2$  adsorption-desorption isotherms of (a) NiO powder, (b) NiO SCs, (c) NiO PCs. (d) BET-specific surface areas of powder NiO, SCs NiO, and PSCs NiO.

**a**

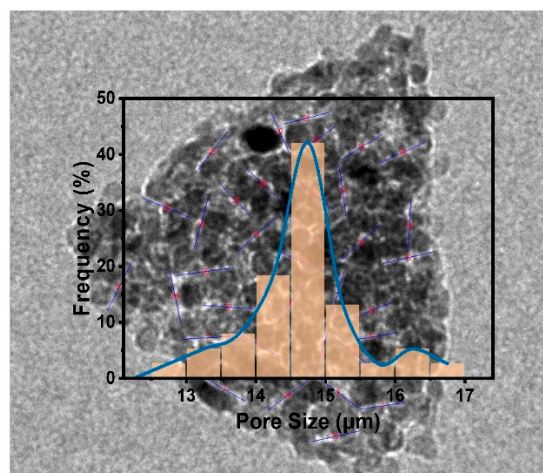

**Figure S9.** (a) Pore size statistics of TEM images from PSC NiO.

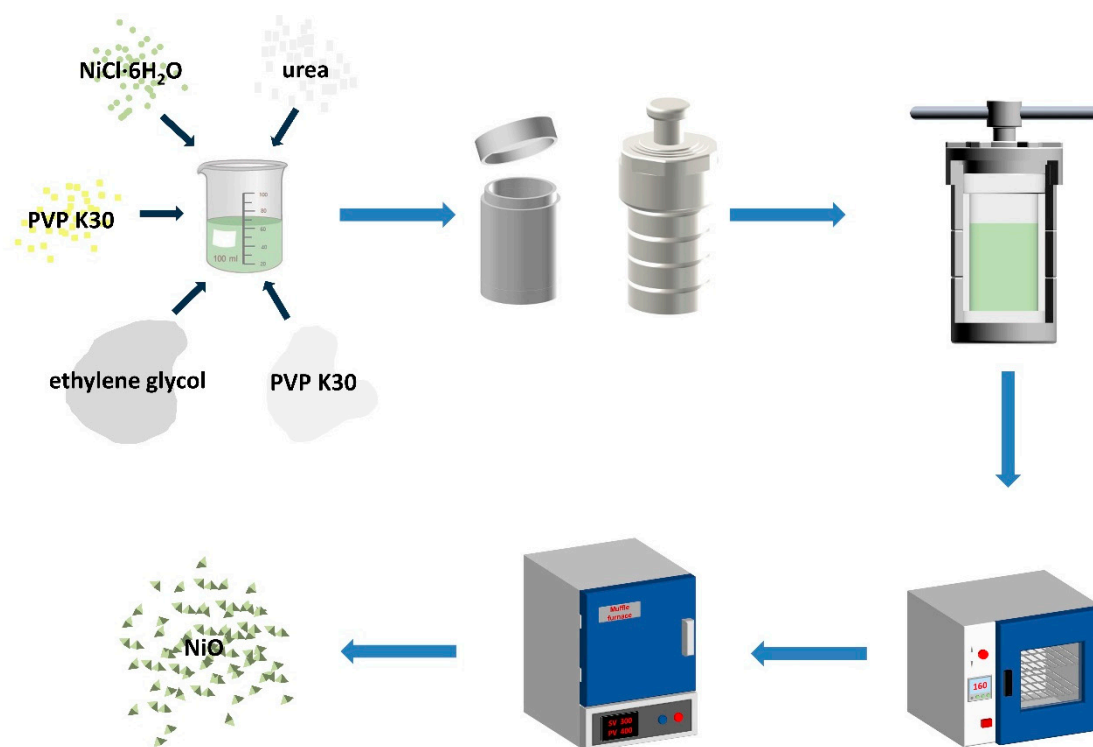

**Figure S10.** Preparation of PSCs NiO precursors by hydrothermal method.

**Table S1.** Comparison of catalysts for the complete oxidation of CO.

| Catalyst                  | CO concentration (ppm) | O <sub>2</sub> content (%) | GHSV <sup>a</sup> or WHSV <sup>b</sup> | Reaction temperature (°C) | Reference |
|---------------------------|------------------------|----------------------------|----------------------------------------|---------------------------|-----------|
| 0.93%Pd/TiO <sub>2</sub>  | 10000                  | 20                         | 30000                                  | T <sub>100</sub> =80      | [1]       |
| 1%Pt/TiO <sub>2</sub>     | 9000                   | 24                         | 22500                                  | T <sub>100</sub> =120     | [2]       |
| 4%Pt/SiO <sub>2</sub>     | 40000                  | 10                         | 15000                                  | T <sub>100</sub> =180     | [3]       |
| 1%Pt/TiO <sub>2</sub> -Co | 10000                  | 20                         | 30000                                  | T <sub>100</sub> =70      | [4]       |
| Au/NiO                    | 10000                  | 20                         | 100000                                 | T <sub>100</sub> =200     | [5]       |
| 0.12%Au/NiO               | 10000                  | 20                         | 21000                                  | T <sub>100</sub> =250     | [6]       |
| La/NiO                    | 10000                  | 20                         | 60000                                  | T <sub>100</sub> =300     | [7]       |
| Co/NiO                    | 16000                  | 20                         | 30000                                  | T <sub>100</sub> =120     | [8]       |
| Ag/NiO                    | 20000                  | 20                         | 12000                                  | T <sub>100</sub> =100     | [9]       |
| 2.07%Pt/NiO               | 10000                  | 20                         | 30000                                  | T <sub>100</sub> =65      | This work |

<sup>a</sup> GHSV means gaseous hourly space velocity (h<sup>-1</sup>).

<sup>b</sup> WHSV means weight hourly space velocity (mL g<sup>-1</sup> h<sup>-1</sup> or g s mL<sup>-1</sup>).

## References

1. Zhai, X.; Liu, C.; Chang, Q.; Zhao, C.; Tan, R.; Peng, H.; Liu, D.; Zhang, P.; Gui, J. TiO<sub>2</sub>-nanosheet-assembled microspheres as Pd-catalyst support for highly-stable low-temperature CO oxidation. *New J. Chem.* **2018**, *42*, 18066–18076, <https://doi.org/10.1039/c8nj03768j>.
2. Liu, J.; Ding, T.; Zhang, H.; Li, G.; Cai, J.; Zhao, D.; Tian, Y.; Xian, H.; Bai, X.; Li, X. Engineering surface defects and metal-support interactions on Pt/TiO<sub>2</sub>(B) nanobelts to boost the catalytic oxidation of CO. *Catal. Sci. Technol.* **2018**, *8*, 4934–4944, <https://doi.org/10.1039/c8cy01410h>.
3. Jung, C.-H.; Yun, J.; Qadir, K.; Naik, B.; Yun, J.-Y.; Park, J.Y. Catalytic activity of Pt/SiO<sub>2</sub> nanocatalysts synthesized via ultrasonic spray pyrolysis process under CO oxidation. *Appl. Catal. B: Environ.* **2014**, *154-155*, 171–176, <https://doi.org/10.1016/j.apcatb.2014.02.014>.
4. Zhao, X.; Hu, Y.; Jiang, H.; Yu, J.; Jiang, R.; Li, C. Engineering TiO<sub>2</sub> supported Pt sub-nanoclusters *via* introducing variable valence Co ion in high-temperature flame for CO oxidation. *Nanoscale* **2018**, *10*, 13384–13392, <https://doi.org/10.1039/c7nr08717a>.
5. Zhang, Y.; Li, Z.; Cao, C.; Hammedi, T.; Waheed, A.; Sami, B.; Zhao, Z.; Li, G. Support Effects on Nickel Hydroxide and Oxide Nanorods Supported Au Nanoparticles for CO Oxidation. *Catal. Lett.* **2023**, 1–11, <https://doi.org/10.1007/s10562-023-04368-1>.
6. Sreethawong, T.; Sitthiwechvijit, N.; Rattanachatchai, A.; Ouraipryvan, P.; Schwank, J.W.; Chavadej, S. Preparation of Au/Y<sub>2</sub>O<sub>3</sub> and Au/NiO catalysts by co-precipitation and their oxidation activities. *Mater. Chem. Phys.* **2010**, *126*, 212–219, <https://doi.org/10.1016/j.matchemphys.2010.11.037>.
7. Djani, F.; Omari, M.; Martínez-Arias, A. Synthesis, characterization and catalytic properties of La(Ni,Fe)O<sub>3</sub>-NiO nanocomposites. *J. Sol-Gel Sci. Technol.* **2015**, *78*, 1–10, <https://doi.org/10.1007/s10971-015-3929-4>.
8. Yi, Y.; Zhang, P.; Qin, Z.; Yu, C.; Li, W.; Qin, Q.; Li, B.; Fan, M.; Liang, X.; Dong, L. Low temperature CO oxidation catalysed by flower-like Ni-Co-O: how physicochemical properties influence catalytic performance. *RSC Adv.* **2018**, *8*, 7110–7122, <https://doi.org/10.1039/c7ra12635b>.
9. Teng, F.; Xu, T.; Zheng, Y.; Liang, S.; Gochoo, B.; Gu, X.; Zong, R.; Yao, W.; Zhu, Y. Formation of hollow NiO single crystals and Ag/NiO flowers. *Mater. Res. Bull.* **2008**, *43*, 3562–3569, <https://doi.org/10.1016/j.materresbull.2008.01.009>.
